# Supplementary material for: SIX2 and SIX3 coordinately regulate functional maturity and fate of human pancreatic β cells
Source: PubMed Central journal article supplement — Genes Dev. 2021 Feb 1;35(3-4):234–49. doi: 10.1101/gad.342378.120 (PMC7849364; doi:10.1101/gad.342378.120), 2021-02-01
Supplement: supp_gad.342378.120_Supplemental_Figures_Tables_F.pdf [file supp_gad.342378.120_Supplemental_Figures_Tables_F.pdf]

Supplemental Fig. 1

GFP/INS/GCG

GFP

INS

GCG

Control

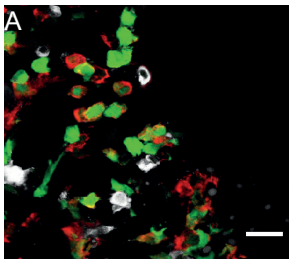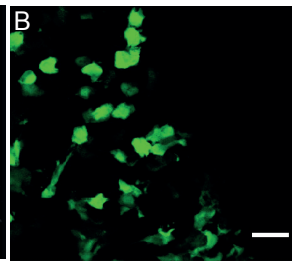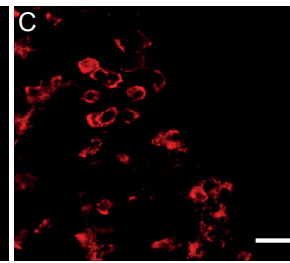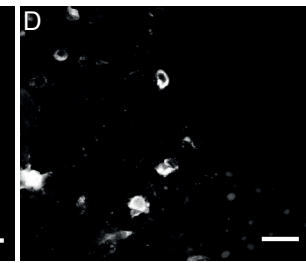

SIX2 KD

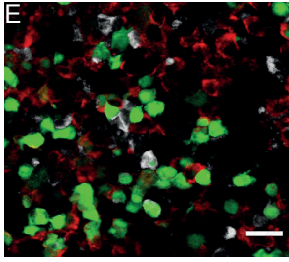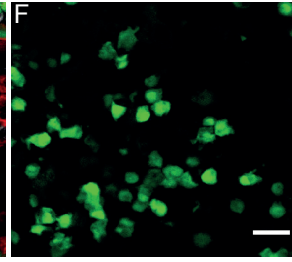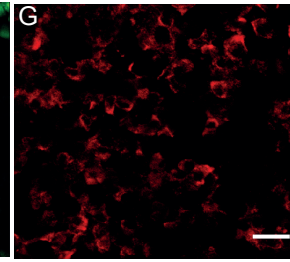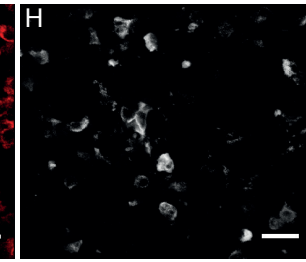

SIX3 KD

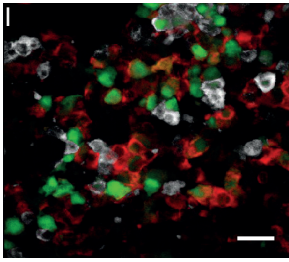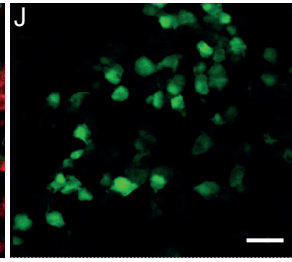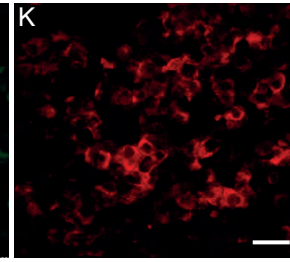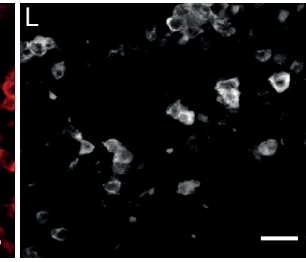

GFP/INS/STT

GFP

INS

STT

Control

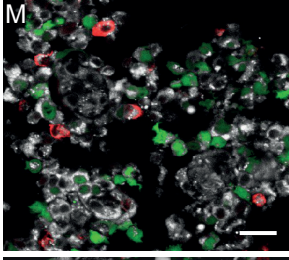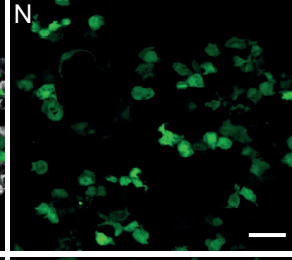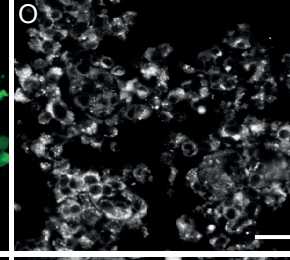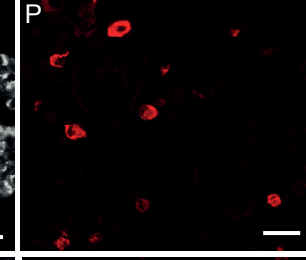

SIX2 KD

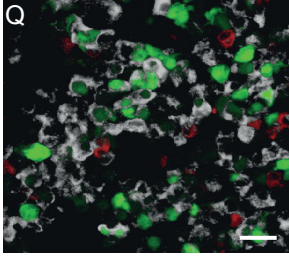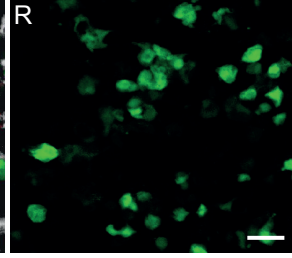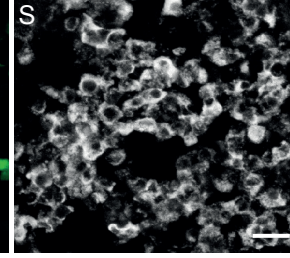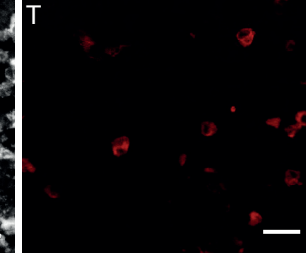

SIX3 KD

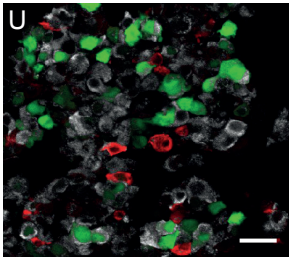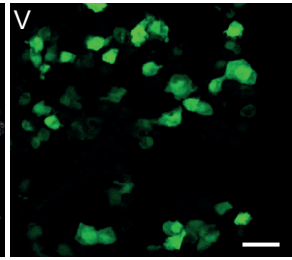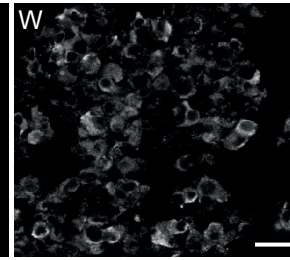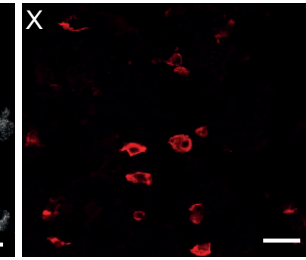

A

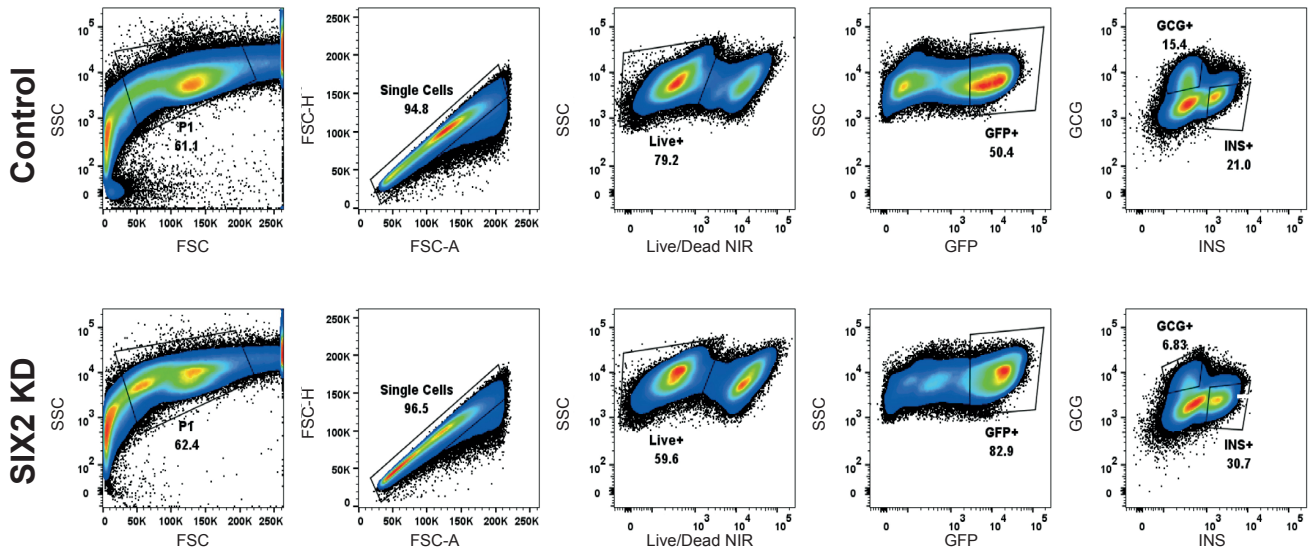

B

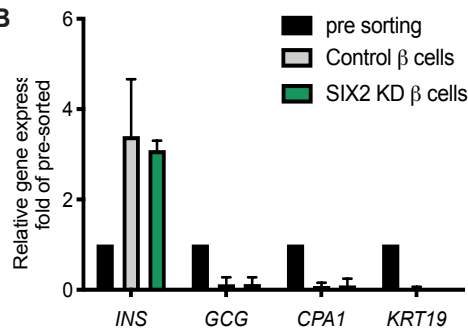

C

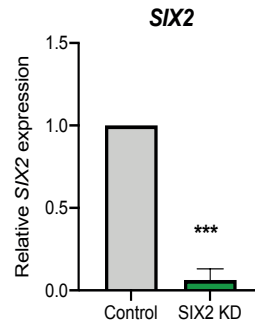

D

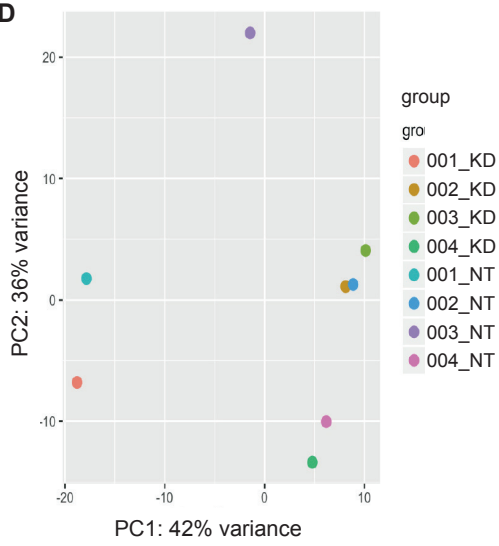

E

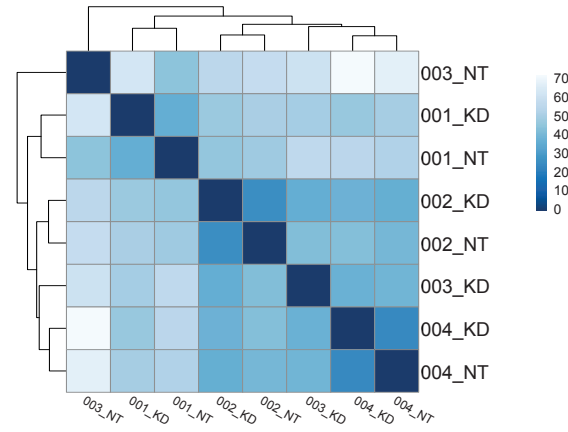

**A Genes downregulated upon SIX2<sup>kd</sup> in  $\beta$ -cells**

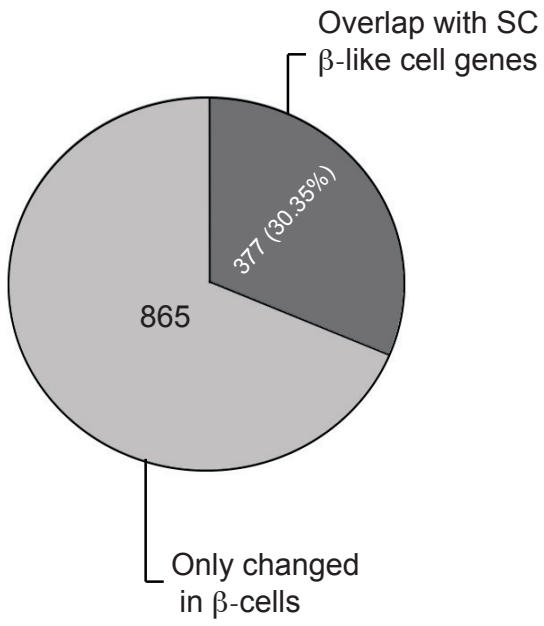

**B Genes upregulated upon SIX2<sup>kd</sup> in  $\beta$ -cells**

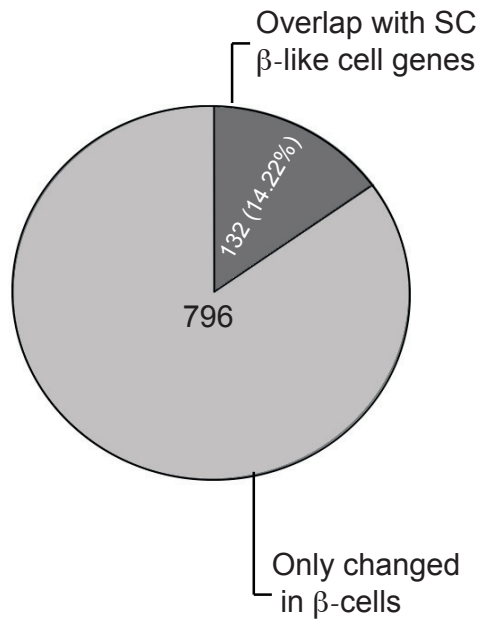

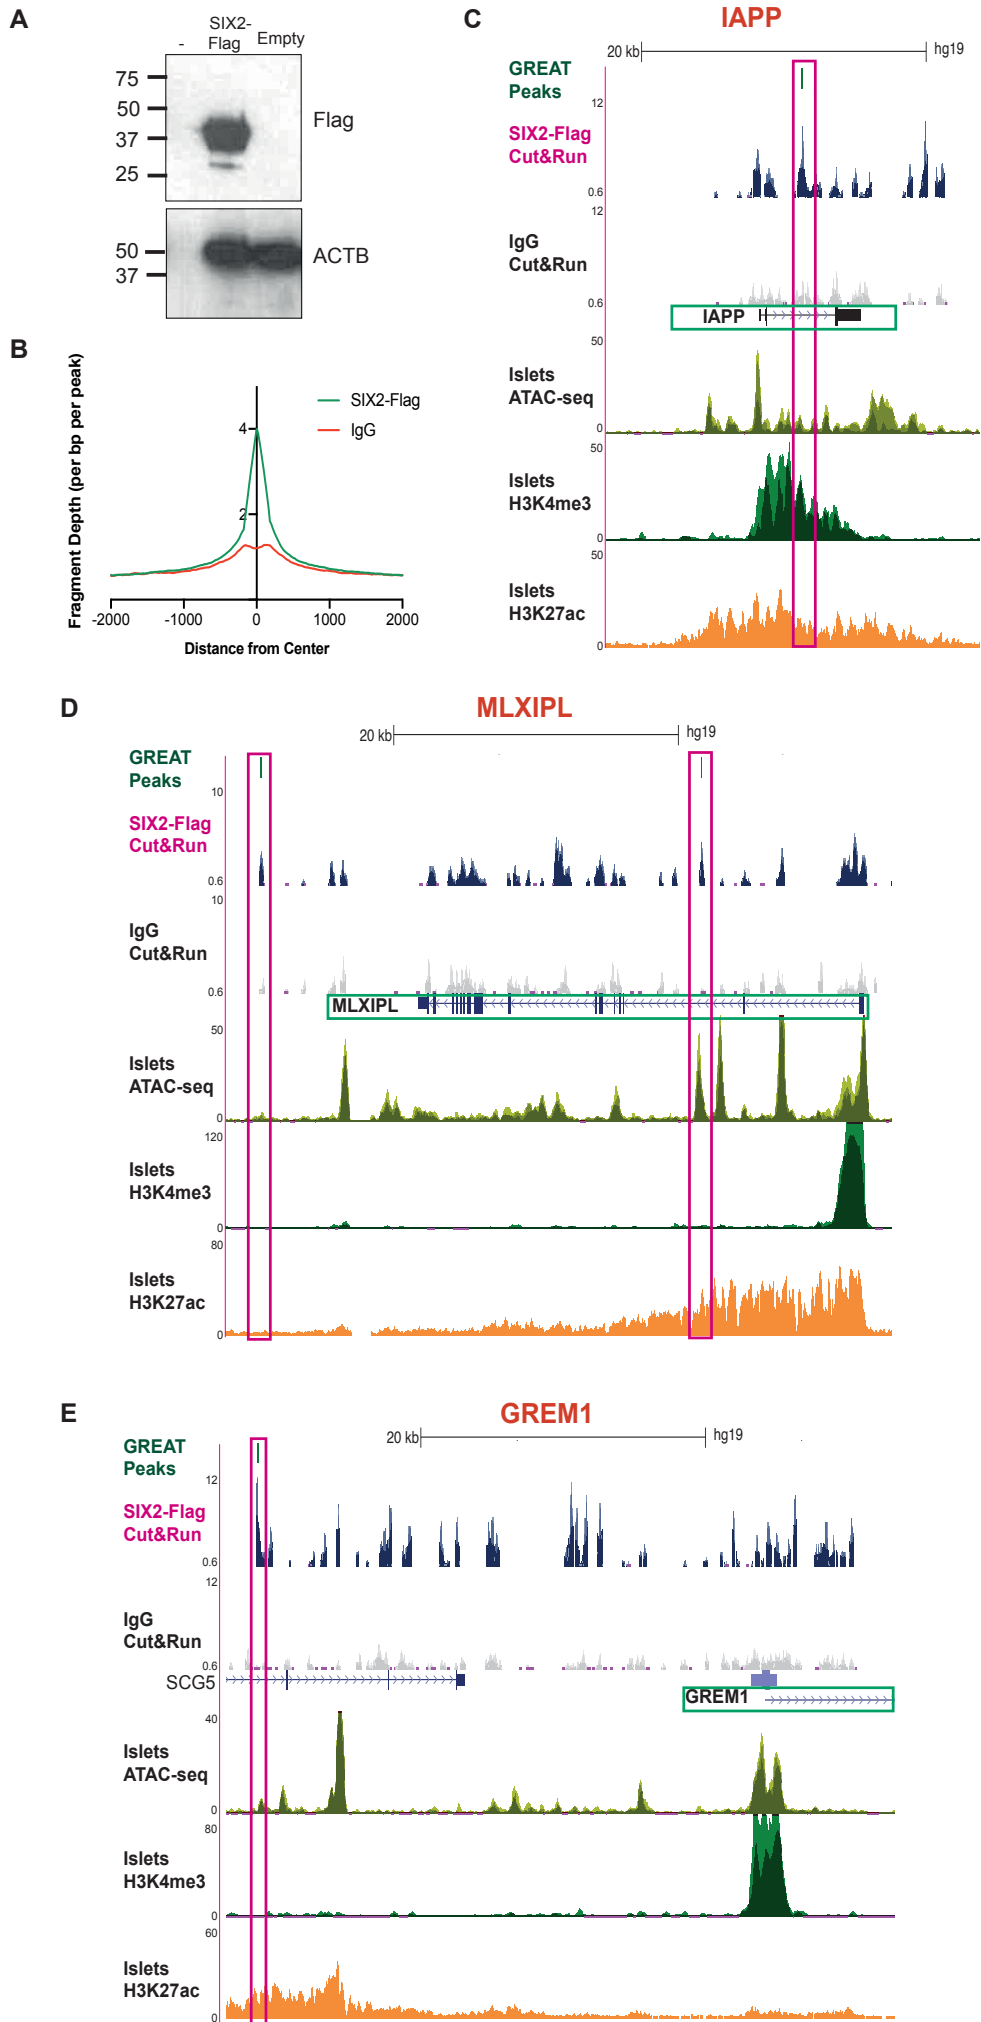

Supplemental Fig. 5

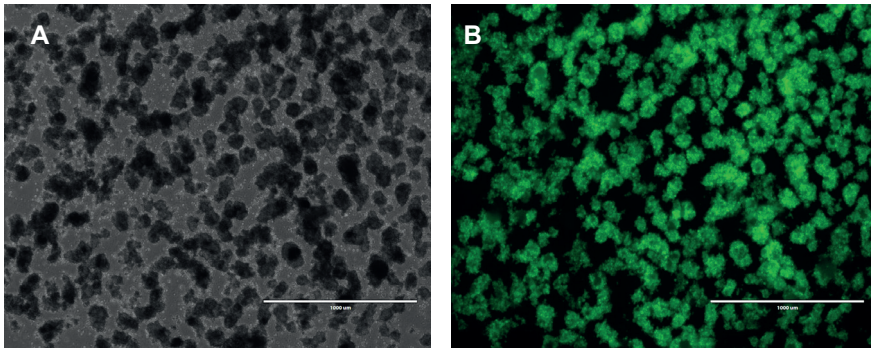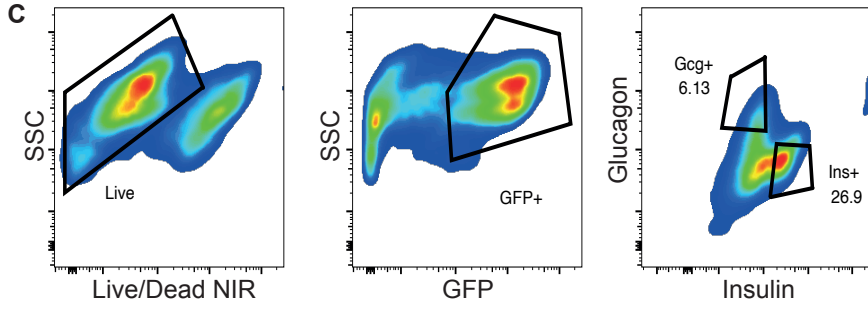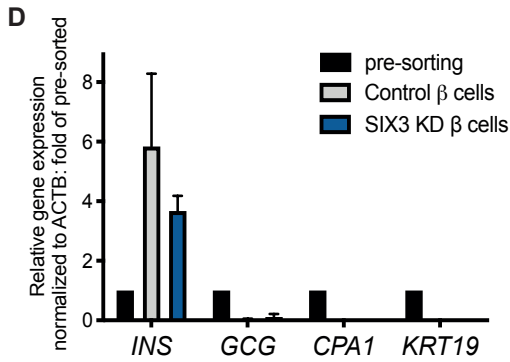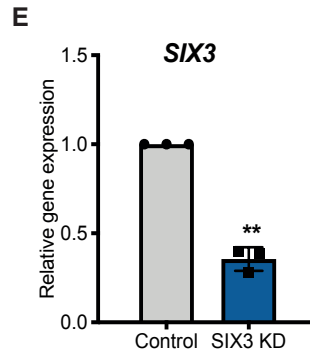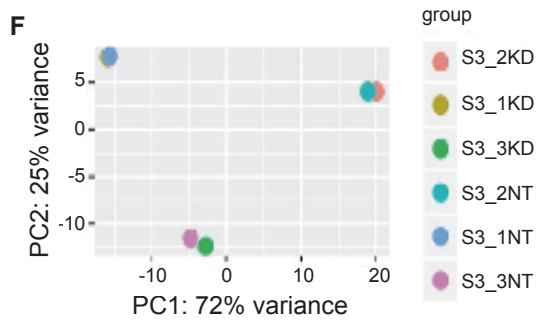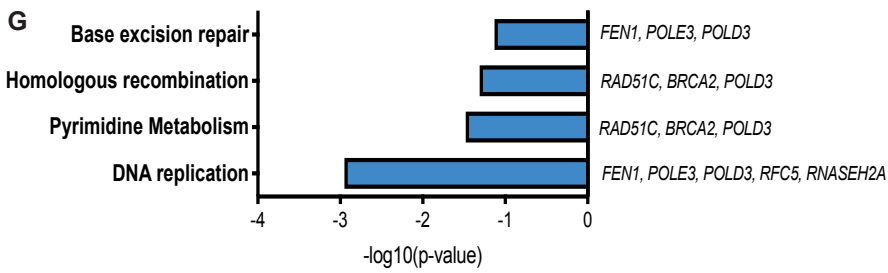

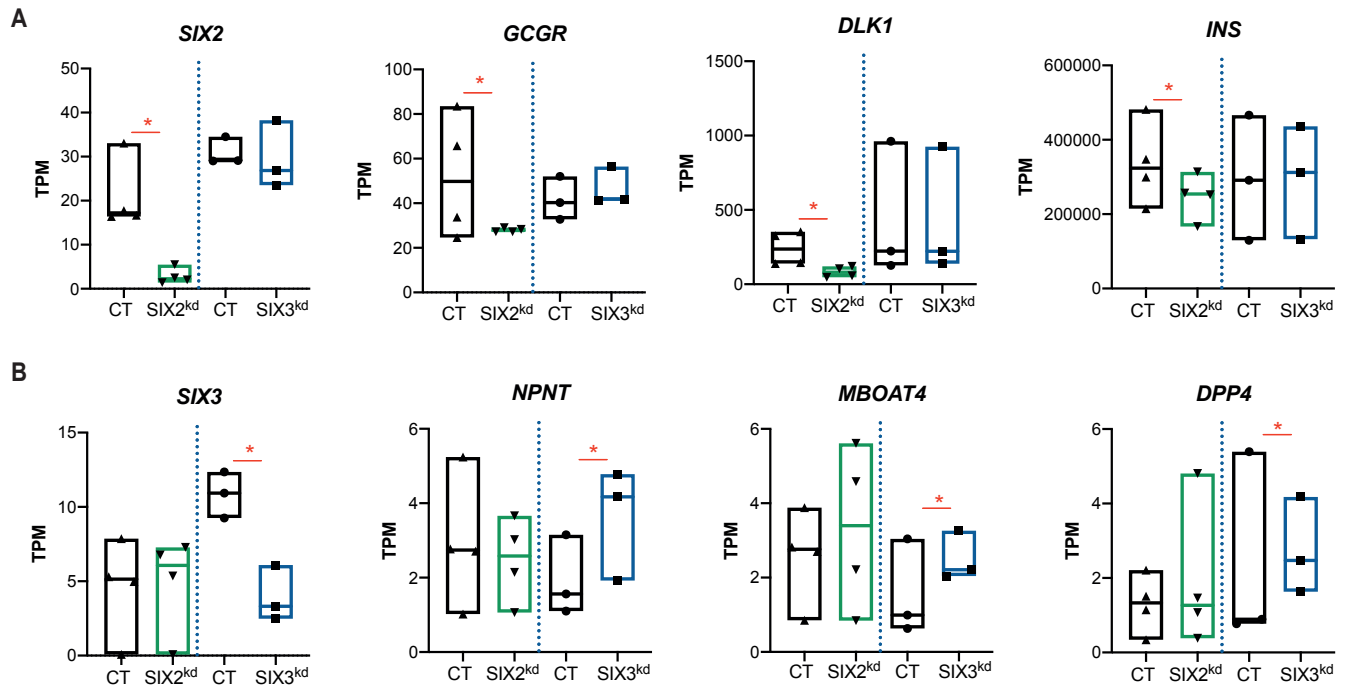

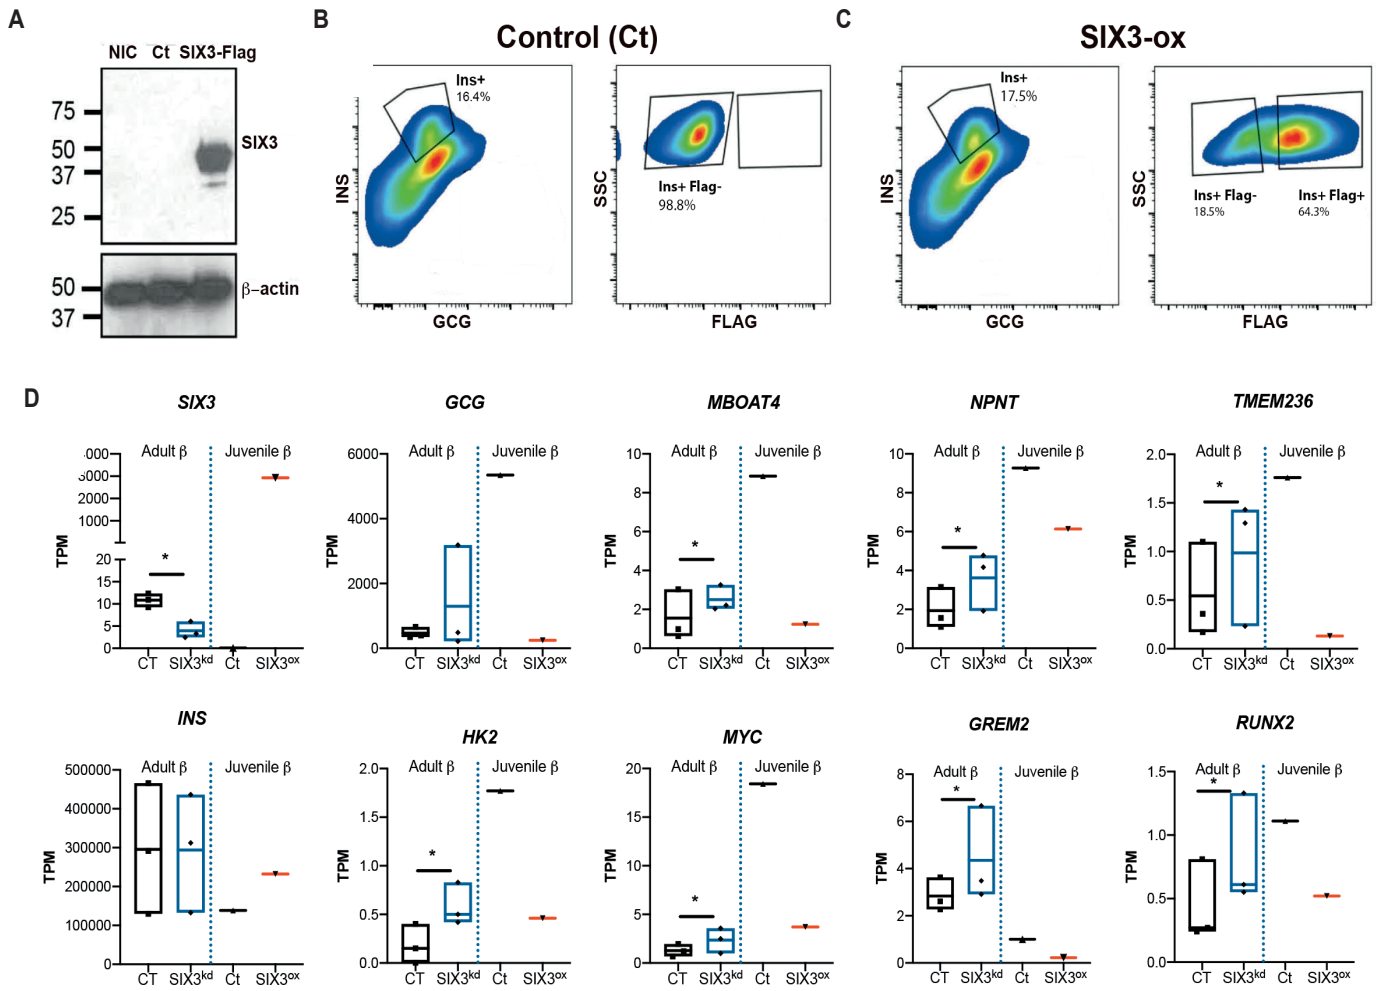



**Table S1.** Information of pancreatic islet donors used in this study.

| Donor prep source  | Identification | Sex | Age      | BMI   | Usage                                                     |
|--------------------|----------------|-----|----------|-------|-----------------------------------------------------------|
| IIDP               | SAMN08617638   | M   | 49       | 34    | SIX3-KD RT-qPCR +GSIS                                     |
| Alberta University | R250           | F   | 26       | 25.4  | SIX3-KD RT-qPCR +GSIS                                     |
| IIDP               | AEJT193A       |     | 51       | 29    | SIX3-KD RT-qPCR +GSIS                                     |
| IIDP               | AEJE412        |     | 55       | 30.1  | SIX3-KD RT-qPCR +GSIS                                     |
| Alberta University | R267           | F   | 64       | 23.7  | SIX3-KD RT-qPCR +GSIS                                     |
| Alberta University | R268           | F   | 48       | 29.2  | SIX3-KD/SIX2-KD RT-qPCR +GSIS                             |
| IIDP               | SAMN09370567   | M   | 32       | 28.5  | SIX3-KD/SIX2-KD RT-qPCR +GSIS                             |
| IIDP               | SAMN09862214   | M   | 31       | 31.8  | SIX3-KD/SIX2-KD RT-qPCR +GSIS                             |
| Alberta University | R286           | M   | 41       | 20.4  | SIX3-KD/SIX2-KD RT-qPCR +GSIS                             |
| AFAO295            | SAMN08611213   | F   | 63       | 24.97 | SIX3-KD/SIX2-KD RT-qPCR +GSIS                             |
| UCSF               | rHIP-122       | M   | 58       | 27.82 | SIX3-KD/SIX2-KD RT-qPCR +GSIS                             |
| UCSF               | rHIP-144       | F   | 47       | 23.51 | SIX3-KD/SIX2-KD GSIS                                      |
| IIDP               | SAMN16191825   |     | 25       | 31.3  | SIX3-KD/SIX2-KD GSIS                                      |
| IIDP               | SAMN15942269   | F   | 63       | 26.9  | SIX3-KD/SIX2-KD GSIS<br>Whole islet RT-qPCR -non-diabetic |
| IIDP               | SAMN09867385   | M   | 24       | 27.2  | SIX3-KD RNA-seq                                           |
| IIDP               | SAMN10079665   | M   | 25       | 31    | SIX3-KD RNA-seq                                           |
| Alberta University | R288           | F   | 69       | 27.7  | SIX3-KD RNA-seq                                           |
| Alberta University | R318           | M   | 54       | 20.5  | SIX2-KD RNA-seq                                           |
| UCSF               | RHIP-133       | F   | 26       | 25    | SIX2-KD RNA-seq                                           |
| Pittsburgh         |                | M   | 24       | 31.8  | SIX2-KD RNA-seq                                           |
| Alberta University | R326           | M   | 26       | 27    | SIX2-KD RNA-seq                                           |
| IIDP               | SAMN13938639   | F   | 50       | 39.2  | RIP-SIX2-Flag CUT&RUN                                     |
| Alberta University | R388           | M   | 45       | 33.8  | RIP-SIX2-Flag CUT&RUN                                     |
| IIDP               | SAMN16427178   | F   | 42       | 31.2  | RIP-SIX2-Flag CUT&RUN                                     |
| CAOP               | AHAX150        | F   | 3        | n.a   | SIX3-overexpression, Beta cell RT-qPCR                    |
| IIAM               | 18 month old   |     | 18 month | n.a   | SIX3-ox, Beta cell RT-qPCR and RNA-seq                    |
| Alberta University | R282           | M   | 57       | 26.4  | Whole islet RT-qPCR-non-diabetic                          |
| Alberta University | R283           | M   | 22       | 22.5  | Whole islet RT-qPCR -non-diabetic                         |
| Alberta University | R357           | M   | 64       | 24.3  | Whole islet RT-qPCR -non-diabetic                         |
| Alberta University | R348           | F   | 43       | 16.4  | Whole islet RT-qPCR -non-diabetic                         |
| IIDP               | SAMN10977276   | M   | 52       | 27.2  | Whole islet RT-qPCR -non-diabetic                         |
| CAOP               | AHHQ227        | F   | 18       | 34.9  | SIX3-KD/SIX2-KD GSIS; Whole islet RT-qPCR -non-diabetic   |
| Alberta University | R347           | M   | 57       | 27.9  | Whole islet RT-qPCR -T2D-diabetic                         |
| NDRI               | AGJU173        | F   | 53       |       | Whole islet RT-qPCR -T2D-diabetic                         |
| HPAP               | AHBD-489       | F   | 50       | 30.5  | Whole islet RT-qPCR -T2D-diabetic                         |
| HPAP               | AHGP286        | M   | 40       | 37    | Whole islet RT-qPCR -T2D-diabetic                         |
| HPAP-PANC-DB       | HPAP-003       | M   | 29       | 24.5  | Non diabetic Beta, alpha cells RNA-seq, islet perfusion   |



|               |          |   |    |      |                                                         |
|---------------|----------|---|----|------|---------------------------------------------------------|
| HPAP-PANC-DB  | HPAP-006 | M | 46 | 19.1 | Non diabetic Beta, alpha cells RNA-seq, islet perfusion |
| HPAP-PANC-DB  | HPAP-008 | F | 24 | 31.9 | Non diabetic Beta, alpha cells RNA-seq, islet perfusion |
| HPAP-PANC-DB  | HPAP-004 | F | 24 | 32.2 | Non diabetic Islet perfusion                            |
| HPAP-PANC-DB  | HPAP-014 | F | 43 | 30.9 | Non diabetic Beta, alpha cells RNA-seq                  |
| HPAP-PANC-DB  | HPAP-017 | M | 30 | 23.7 | Non diabetic Beta, alpha cells RNA-seq, islet perfusion |
| HPAP-PANC-DB  | HPAP-001 | M | 47 | 32.2 | T2-Diabetic Beta, alpha cells RNA-seq                   |
| HPAP- PANC-DB | HPAP-007 | F | 65 | 42.6 | T2-Diabetic Islet perfusion                             |
| HPAP- PANC-DB | HPAP-010 | F | 42 | 36.8 | T2-Diabetic Beta, alpha cells RNA-seq, perfusion        |
| HPAP-PANC-DB  | HPAP-013 | F | 28 | 41.6 | T2-Diabetic Beta, alpha cells RNA-seq, perfusion        |

**Table S7.** *SIX2*<sup>kd</sup> in primary  $\beta$ -cells results in de-regulation of genes whose expression changes with age in  $\beta$ -cells (see methods for details).

| <b><i>SIX2</i><sup>kd</sup> downregulated genes (<i>P</i>&lt;0.05) enriched in adult <math>\beta</math>-cells (<i>P</i>&lt;0.01)</b> |         |          |          | <b><i>SIX2</i><sup>kd</sup> upregulated genes (<i>P</i>&lt;0.05) enriched in juvenile <math>\beta</math>-cells (<i>P</i>&lt;0.01)</b> |           |        |
|--------------------------------------------------------------------------------------------------------------------------------------|---------|----------|----------|---------------------------------------------------------------------------------------------------------------------------------------|-----------|--------|
| AACS                                                                                                                                 | FAM107A | NOMO1    | SORL1    | ACAT2                                                                                                                                 | PAR6B     | POMZP3 |
| ABLIM1                                                                                                                               | FAM3B   | NPAS2    | SPINT2   | ARHGAP11B                                                                                                                             | PBX2      | PTGFR  |
| ACAT1                                                                                                                                | FAM47E  | NRCAM    | SPTBN4   | ARIH2OS                                                                                                                               | PCGF6     | ZBTB2  |
| ADAP2                                                                                                                                | FBLN7   | OLFM1    | ST14     | ARSK                                                                                                                                  | PHF19     | ZNF581 |
| ADCYAP1                                                                                                                              | FBXO2   | OMA1     | STEAP2   | ATG2A                                                                                                                                 | PHLDA1    |        |
| ADSSL1                                                                                                                               | FBXO44  | P2RX2    | STEAP3   | AURKA                                                                                                                                 | PIM2      |        |
| AGT                                                                                                                                  | FRRS1L  | P4HA2    | STUB1    | BAK1                                                                                                                                  | PIP5K1A   |        |
| AKR7A3                                                                                                                               | GALNT11 | PAM      | STXBP6   | BAZ1A                                                                                                                                 | PLAGL2    |        |
| ALDOA                                                                                                                                | GCGR    | PAPSS2   | SULT4A1  | BTK                                                                                                                                   | POLE4     |        |
| ANKH                                                                                                                                 | GDA     | PCDHA10  | SUN1     | C12orf4                                                                                                                               | PPM1D     |        |
| ANKRD24                                                                                                                              | GHDC    | PCDHA6   | SUSD4    | C16orf72                                                                                                                              | PRR14     |        |
| ANKRD34C                                                                                                                             | GLT8D2  | PCDHB5   | SYNE2    | C19orf54                                                                                                                              | PTGS2     |        |
| ANXA7                                                                                                                                | GOLGA8A | PCDHGA4  | SYNPO    | CACNB1                                                                                                                                | PYCR1     |        |
| APCDD1L                                                                                                                              | GOLGA8B | PCDHGA8  | SYT16    | CCL20                                                                                                                                 | RAB42     |        |
| APH1A                                                                                                                                | GPRASP1 | PCDHGB7  | TBC1D8   | CCL5                                                                                                                                  | RACGAP1   |        |
| AQP3                                                                                                                                 | GREM1   | PEBP1    | TGOLN2   | CCNA2                                                                                                                                 | RASGRP3   |        |
| ATP6V0E2                                                                                                                             | GRIA2   | PFKP     | THBD     | CCNB2                                                                                                                                 | RASSF3    |        |
| BNIP3                                                                                                                                | GRIA3   | PIGZ     | TMEM132D | CCNYL1                                                                                                                                | RET       |        |
| C1orf115                                                                                                                             | GRIPAP1 | PLCB1    | TMEM176B | CD3EAP                                                                                                                                | RFX7      |        |
| C1orf127                                                                                                                             | GRM1    | PLOD2    | TMEM246  | CDC25A                                                                                                                                | RGMA      |        |
| C4orf3                                                                                                                               | GSN     | PLXND1   | TMEM255A | CDCA7L                                                                                                                                | RMI2      |        |
| C7orf50                                                                                                                              | HGD     | PNMA2    | TMEM59   | CDKN2AIP                                                                                                                              | SIAH2     |        |
| CACNA1C                                                                                                                              | HHAT    | POP4     | TMEM74B  | CDR2L                                                                                                                                 | SLC16A4   |        |
| CACNA1D                                                                                                                              | HIBADH  | PPIP5K1  | TMOD1    | CENPM                                                                                                                                 | SLC38A2   |        |
| CAPN13                                                                                                                               | HIVEP3  | PPL      | TMX4     | CITED2                                                                                                                                | SMC4      |        |
| CAPN2                                                                                                                                | HOOK2   | PPP2R2C  | TNS1     | CLDN15                                                                                                                                | SNAI1     |        |
| CBX7                                                                                                                                 | HOPX    | PRDX1    | TPD52    | CLSPN                                                                                                                                 | SOD2      |        |
| CCDC149                                                                                                                              | HPRT1   | PRDX4    | TSPAN13  | CXorf38                                                                                                                               | SPNS1     |        |
| CCDC85C                                                                                                                              | HSF4    | PRKAG2   | TSPAN7   | DAPP1                                                                                                                                 | SRF       |        |
| CD5                                                                                                                                  | HSPA12A | PRMT2    | TUBA1A   | DCAF12                                                                                                                                | SRSF3     |        |
| CD9                                                                                                                                  | IAPP    | PROCR    | TXNDC5   | DCUN1D3                                                                                                                               | STK17B    |        |
| CD99                                                                                                                                 | IDS     | PRSS23   | TYW3     | ESPL1                                                                                                                                 | SUV39H2   |        |
| CDKN1A                                                                                                                               | IGFBP3  | PRUNE2   | UCHL1    | EXOSC5                                                                                                                                | TCEANC2   |        |
| CDKN1C                                                                                                                               | IGIP    | PSAP     | UNC79    | FAM189B                                                                                                                               | TMC6      |        |
| CHGB                                                                                                                                 | IGSF21  | PTPN3    | VAT1L    | FAM83D                                                                                                                                | TMEM170A  |        |
| CHRM3                                                                                                                                | IL17RB  | PTPRN    | VWA5A    | FANCA                                                                                                                                 | TMPO      |        |
| CLCN3                                                                                                                                | IL20RA  | QPCT     | VWDE     | FOSL2                                                                                                                                 | TNFRSF10C |        |
| CLU                                                                                                                                  | ITPR3   | RAB17    | WDR45B   | GAS2L3                                                                                                                                | TONSL     |        |
| CMTM4                                                                                                                                | JAKMIP3 | RAP1GAP2 | WFS1     | H2AFX                                                                                                                                 | TOR4A     |        |
| CMTM8                                                                                                                                | KCND3   | RASGRF1  | WNT4     | HIST1H2BK                                                                                                                             | TP53      |        |
| CNKSR2                                                                                                                               | KCNK1   | RIC3     | WSCD2    | HIST1H4H                                                                                                                              | TPX2      |        |
| COG2                                                                                                                                 | KCNK17  | RIN2     | WWC3     | HIST2H2AA4                                                                                                                            | TRIAP1    |        |
| CPB1                                                                                                                                 | KCNK3   | RUFY3    | XDH      | HMGCR                                                                                                                                 | TXNIP     |        |
| CPE                                                                                                                                  | KIRREL3 | RYR2     | XKR4     | IFFO2                                                                                                                                 | USP42     |        |
| CPLX1                                                                                                                                | KLHL36  | SCD5     | ZBTB22   | IFITM3                                                                                                                                | VNN3      |        |
| CPLX2                                                                                                                                | LAMA5   | SCG5     | ZFYVE28  | IL1RN                                                                                                                                 | WDR47     |        |
| CPNE4                                                                                                                                | LGI3    | SCGB2A1  | ZNF395   | ISG20L2                                                                                                                               | WDR62     |        |
| CRYL1                                                                                                                                | LIMCH1  | SCN1B    | AK4      | KBTD2                                                                                                                                 | XAF1      |        |

|          |        |          |          |         |         |
|----------|--------|----------|----------|---------|---------|
| CTAGE6   | LPIN3  | SCN8A    | APBA1    | KCNJ2   | ZNF264  |
| CTSB     | LRP2BP | SEC11C   | CRYZ     | KDM2B   | ZNF490  |
| DAP      | LYRM9  | SEMA5A   | DLK1     | KDM6A   | ZNF527  |
| DDR1     | MAN1C1 | SETD7    | EFR3B    | KIFC1   | ZNF570  |
| DGCR2    | MAPT   | SGSM1    | FA2H     | KLF16   | ZNF574  |
| DHRS2    | MBP    | SH3YL1   | GPX2     | KLF3    | ZNF669  |
| DIRAS3   | MCOLN3 | SHROOM1  | GREM2    | KLF4    | ZNF829  |
| DLGAP4   | MDH1B  | SIAE     | HIGD1A   | KLHL15  | ZNF835  |
| DMKN     | ME3    | SIX2     | HIST1H1E | KPNA2   | ZNF850  |
| DOCK9    | METRNL | SLC16A12 | KIF26B   | LEAP2   | ZSWIM8  |
| DPH6     | MICAL3 | SLC25A27 | KREMEN1  | LSMEM1  | ARL4A   |
| DPP7     | MICU2  | SLC35D3  | LPCAT1   | MCL1    | BBC3    |
| DYNLT3   | MLXIPL | SLC35F3  | MALL     | MID1IP1 | BRCA2   |
| DZIP1L   | MT1E   | SLCO5A1  | NFIC     | MSMO1   | C1QTNF9 |
| ECHDC2   | MT1F   | SMAD9    | SDK2     | MTF1    | C2CD2L  |
| EHBP1    | MT1X   | SMARCD3  | SLC7A4   | MTG2    | CCDC116 |
| EHF      | MUC13  | SMIM5    | SLC9A3R2 | NEB     | CCDC168 |
| ENO2     | MYH14  | SMOC1    | TMEM132B | NETO2   | CD300LB |
| ENPP5    | MYO1D  | SMPDL3A  | TMEM184B | NLRC4   | CDC45   |
| ENTPD3   | MYO5C  | SNAP25   | TSKU     | NR4A2   | HSPBAP1 |
| ENTPD6   | NBEAL1 | SNCB     | TTC7B    | NRAS    | ITGA2B  |
| EPB41L4B | NDRG1  | SNRNP35  | UNC5B    | NUSAP1  | LAT     |
| EPCAM    | NEIL2  | SNTA1    | WSCD1    | OLFML3  | LRRN3   |
| EPHX2    | NFASC  | SNX29    |          |         |         |

**Table S8.** Genes showing DE upon *SIX2*<sup>kd</sup> and *SIX3*<sup>kd</sup> in the adult  $\beta$ -cell ( $P < 0.05$ )

|          |            |         |              |         |          |         |         |
|----------|------------|---------|--------------|---------|----------|---------|---------|
| A1CF     | DDX55      | ITM2C   | RADIL        | VWA1    | ZNF829   | SF3A2   | SLIT1   |
| ACCS     | EIF5       | KCNA5   | RBM15        | WDR81   | RRM2B    | RNF38   | SLC44A2 |
| ACOT7    | FEN1       | KHSRP   | RSAD1        | ZIK1    | GLT8D2   | GPRASP1 | TSKU    |
| ACSL6    | FFAR4      | KLHL29  | SH2B3        | ZNF547  | GDF15    | CAPN13  | FBLN1   |
| ANKRD40  | FST        | LRP1    | SLC9A3R2     | ZNF57   | FXD6     | PIIP5K1 | PLXDC2  |
| ARFGEF3  | GAREM1     | LRRC75A | SMIM32       | ZNF77   | SYT7     | ZFYVE28 | NEB     |
| ARL14    | GDNF       | MAST1   | SPEG         | ZSWIM4  | RGS11    | ZBTB22  | CCL20   |
| ATP2A3   | GHRL       | MAX     | SRA1         | TPX2    | SCD5     | SHROOM1 |         |
| B4GALNT3 | GPR142     | MPV17L2 | STOM         | GAS2L3  | RAP1GAP  | NCKAP5  |         |
| BRCA2    | GRIN2C     | MYO1A   | SVOP         | CDC37L1 | HILPDA   | PFKP    |         |
| BRINP1   | HGH1       | OLIG1   | TAF5         | ZNF556  | OBSL1    | KCNMB2  |         |
| BST2     | HIPK2      | OVGP1   | THOC5        | ZNF296  | SNCB     | GREM2   |         |
| C4B      | HIST2H2AA3 | PCDHA7  | TLE2         | CDR2L   | RAP1GAP2 | KCND3   |         |
| CACNA1H  | HS6ST3     | PHF7    | TMEM132A     | PSAT1   | ITPR3    | COL6A1  |         |
| CAMK2N1  | IDI1       | PLCH2   | TMEM237      | CD3EAP  | TRPM3    | PTPRS   |         |
| CD300A   | IFIT2      | POLE3   | TREX1        | PROCR   | NDRG1    | HAP1    |         |
| COL27A1  | INSYN1     | PTK7    | TSPOAP1      | CRELD2  | CCDC85C  | HGD     |         |
| CXCL5    | ISG20      | RAD21   | URGCP.MRPS24 | SUPV3L1 | TNS1     | PBX2    |         |

**Table S9.** *SIX3*<sup>kd</sup> in primary  $\beta$ -cells results in upregulation of genes enriched in juvenile  $\beta$ -cells (see methods for details).

| <b><i>SIX3</i><sup>kd</sup> upregulated genes (<i>P</i>&lt;0.05) enriched in juvenile <math>\beta</math>-cells (<i>P</i>&lt;0.01)</b> |       |         |        |        |          |        |
|---------------------------------------------------------------------------------------------------------------------------------------|-------|---------|--------|--------|----------|--------|
| ADD3                                                                                                                                  | CELF3 | ELF4    | INSR   | NFIB   | PTPRS    | VNN1   |
| ANO6                                                                                                                                  | CNN2  | EVI2B   | IQGAP2 | NPAS4  | SERPING1 | WIZ    |
| ANTXR2                                                                                                                                | CNOT3 | FAM126A | KCNMB2 | PBX2   | SH3GL1   | ZNF341 |
| ANXA1                                                                                                                                 | DMD   | FBLN1   | KCTD12 | PCGF2  | SLC1A5   | C4B    |
| ATG9A                                                                                                                                 | DMTN  | FOXP4   | LYZ    | PDK2   | SLC44A2  | CD302  |
| BCL6                                                                                                                                  | DOCK8 | FSTL1   | MVB12B | PHF12  | THBS1    | GHRL   |
| BCL7A                                                                                                                                 | DPP4  | HILPDA  | MYC    | PLXDC2 | TJP2     | INPPL1 |
| CCL20                                                                                                                                 | DUSP2 | HK2     | NCKAP5 | PLXNA1 | TLE3     | RNF182 |
| CCNG2                                                                                                                                 | EBF4  | IER5L   | NDST2  | PPDPF  | TMEM236  | TNRC18 |
| CD248                                                                                                                                 | EHD2  | INSM1   | NEB    | PTPN12 | TSKU     | VIT    |

**Table S12.** List of genes DE by *SIX2*<sup>kd</sup> both in adult human  $\beta$ -cells (this study) and SC- $\beta$ -like cells (Velazco-Cruz et al 2020). DESeq2 was used to calculate DE genes with log<sub>2</sub>FC ( $P < 0.05$ )

| Genes downregulated post <i>SIX2</i> <sup>kd</sup> in human $\beta$ -cells and SC- $\beta$ -like cells |           |           |         |          | Genes upregulated post <i>SIX2</i> <sup>kd</sup> in human $\beta$ -cells and SC- $\beta$ -like cells |         |
|--------------------------------------------------------------------------------------------------------|-----------|-----------|---------|----------|------------------------------------------------------------------------------------------------------|---------|
| A1CF                                                                                                   | DEPP1     | ISYNA1    | PCDHGA8 | SLC35F3  | AOC3                                                                                                 | PLAGL2  |
| ABCA2                                                                                                  | DEPTOR    | ITM2C     | PCDHGB7 | SLC4A3   | ARL4A                                                                                                | POLE3   |
| ABCC3                                                                                                  | DHRS2     | JAKMIP3   | PCP4    | SLC4A8   | ARRDC4                                                                                               | POLR1E  |
| ABCC4                                                                                                  | DIRAS3    | KCNA5     | PCSK1N  | SLC7A4   | ATP8B2                                                                                               | POLR3D  |
| ABHD14A                                                                                                | DLK1      | KCND3     | PCSK6   | SLC9A3R2 | B3GALNT2                                                                                             | PRG4    |
| ABHD14B                                                                                                | DMKN      | KCNIP2    | PDE9A   | SLCO5A1  | BAZ1A                                                                                                | PRMT3   |
| ABLIM1                                                                                                 | DNM1      | KCNJ6     | PFKP    | SMARCD3  | BST2                                                                                                 | PROB1   |
| ACADVL                                                                                                 | DOCK9     | KCNK1     | PFN2    | SMIM32   | C16orf72                                                                                             | PRR14   |
| ACCS                                                                                                   | DPP6      | KCNK16    | PHLDB2  | SMIM6    | C19orf48                                                                                             | PRRC1   |
| ACOXL                                                                                                  | DSCAML1   | KCNK17    | PIGZ    | SMKR1    | C21orf91                                                                                             | PRSS8   |
| ACSL6                                                                                                  | DZIP1L    | KCNMA1    | PIPOX   | SMOC1    | CALU                                                                                                 | PRX     |
| ACTN1                                                                                                  | ECEL1     | KCNMB2    | PLA2G6  | SNAP25   | CCDC134                                                                                              | PTCH2   |
| ADA2                                                                                                   | EDN3      | KCNQ2     | PLCB1   | SNCB     | CCDC17                                                                                               | PTGFR   |
| ADAMTS2                                                                                                | ELF3      | KIAA1211L | PLCE1   | SNTA1    | CCNB1IP1                                                                                             | PTGS2   |
| ADCY1                                                                                                  | EMB       | KIF12     | PLD3    | SORL1    | CCSAP                                                                                                | PYCR1   |
| ADCYAP1                                                                                                | ENO2      | KIF5C     | PLEKHB1 | SPATA20  | CD274                                                                                                | RALA    |
| ADSSL1                                                                                                 | ENTPD1    | KIRREL3   | PLEKHG6 | SPON2    | CDC25A                                                                                               | RASSF1  |
| AK4                                                                                                    | EPB41L1   | KLHL29    | PLXND1  | SPTBN4   | CDCA7L                                                                                               | RCC1    |
| ALDOA                                                                                                  | EPB41L4B  | LGI3      | PNMA2   | SRGAP3   | CEBPB                                                                                                | RCL1    |
| ANGPTL4                                                                                                | EPHX2     | LIMCH1    | PNPLA4  | SSTR2    | CEP85                                                                                                | RGMA    |
| ANKRD24                                                                                                | F12       | LINGO2    | POMGNT1 | ST8SIA3  | CFAP77                                                                                               | RIPK2   |
| ANKRD34C                                                                                               | FAM131C   | LMO1      | PPL     | STEAP2   | CHKA                                                                                                 | SAR1A   |
| ANKRD37                                                                                                | FAM228B   | LPIN3     | PPP1R36 | STEAP3   | CITED2                                                                                               | SESN2   |
| ANKRD6                                                                                                 | FAM229B   | LPP       | PPP2R2C | STXBP1   | CLDND2                                                                                               | SHMT1   |
| APBA1                                                                                                  | FBXO2     | LRFN2     | PPY     | SULF2    | CMYA5                                                                                                | SLC22A1 |
| APPL2                                                                                                  | FBXO44    | LRP2BP    | PRAG1   | SULT4A1  | COA7                                                                                                 | SLC30A1 |
| ARFGEF3                                                                                                | FFAR1     | MAG1      | PRKACA  | SUSD4    | CREB3                                                                                                | SLC38A2 |
| ARSD                                                                                                   | FFAR4     | MALL      | PRKAG2  | SYNGR1   | CYTH3                                                                                                | SNX8    |
| ASRGL1                                                                                                 | FGF14     | MAN1C1    | PRPH    | SYNPO    | DCLRE1B                                                                                              | SRF     |
| ATP2B4                                                                                                 | FGFR1     | MAP1LC3A  | PRPS2   | SYT16    | DDX20                                                                                                | STX6    |
| ATP6V0E2                                                                                               | FGGY      | MAPK10    | PRSS22  | SYT17    | DDX55                                                                                                | SUV39H2 |
| B3GNT3                                                                                                 | FRRS1L    | MAPRE3    | PSD     | SYT7     | DNAH11                                                                                               | TAF1D   |
| BAALC                                                                                                  | FSTL4     | MDH1B     | PSD4    | TAGLN3   | DUSP14                                                                                               | TAPT1   |
| BABAM2                                                                                                 | FXYD3     | ME3       | PTGDR2  | TCERG1L  | EIF5                                                                                                 | TEAD2   |
| BACE2                                                                                                  | FXYD6     | MEIS3     | PTK2B   | TCTN1    | ESAM                                                                                                 | TGIF2   |
| BAIAP3                                                                                                 | FYB2      | METRNL    | PTPRN   | TENM1    | ESPL1                                                                                                | THAP9   |
| BDKRB2                                                                                                 | GABARAPL2 | MGAT4C    | PTPRS   | THBD     | FAM160A1                                                                                             | THUMPD2 |
| BLOC1S6                                                                                                | GABRA2    | MISP      | PTPRT   | TIAM1    | FLCN                                                                                                 | TMEM136 |

|          |          |         |          |          |           |          |
|----------|----------|---------|----------|----------|-----------|----------|
| BRINP1   | GALNT10  | MLXIPL  | PXK      | TM4SF4   | FOSL2     | TMEM167B |
| BTN3A3   | GAMT     | MPP2    | QDPR     | TMEM125  | FST       | TMEM39A  |
| C1orf127 | GCG      | MRAP2   | QPCT     | TMEM132A | HIST1H2BK | TMPO     |
| C22orf42 | GCK      | MROH7   | RAB26    | TMEM132D | HIST1H4J  | TOR4A    |
| C9orf16  | GDA      | MS4A8   | RAB31    | TMEM158  | HIST3H2A  | TP53     |
| CACNA1C  | GDPD5    | MSRB2   | RAB3B    | TMEM163  | HMOX1     | VPS37B   |
| CAMK1D   | GJB1     | MTA3    | RAB4B    | TMEM255A | HRK       | WDR90    |
| CAMK2B   | GLT8D2   | MYH10   | RAB9B    | TMEM42   | ICK       | X9.Mar   |
| CAMK2N1  | GNB5     | MYL7    | RABL3    | TMEM61   | IFFO2     | ZBTB24   |
| CAPN2    | GPD1     | MYO1D   | RASA4    | TMEM74B  | ISG20L2   | ZBTB5    |
| CASR     | GPR148   | MYO5B   | RASGRF1  | TMOD1    | KBTBD8    | ZHX1     |
| CBX7     | GPRASP1  | MYT1L   | RBP4     | TMPRSS6  | KIF24     | ZIK1     |
| CCDC159  | GRIA2    | NBEAL1  | RDX      | TMX4     | KIF27     | ZNF267   |
| CCKBR    | GRIN3B   | NCAM1   | RGS11    | TNS2     | KLF3      | ZNF474   |
| CCND2    | GRM1     | NCKAP5  | RHOA     | TP53I11  | KLHL21    | ZNF551   |
| CCNI     | GSN      | NDRG1   | RIMBP2   | TPM4     | KMT5A     | ZNF57    |
| CDH22    | GSTM2    | NECAB2  | RTN1     | TRIM2    | LRRRC66   | ZNF581   |
| CDKN1A   | HAP1     | NFAM1   | RTN4RL1  | TRMT9B   | LYAR      | ZNF749   |
| CELF4    | HEPACAM2 | NFASC   | RYR2     | TSPAN1   | LYG1      | ZNF813   |
| CERK     | HOPX     | NLRP1   | S100B    | TSPAN7   | MCM2      | ZNF841   |
| CHD3     | HSD3B7   | NPAS2   | SARDH    | TSPOAP1  | METTL1    | ZNF850   |
| CHDH     | HSF4     | NPDC1   | SCG5     | TTLL6    | MGME1     |          |
| CHGB     | HSPA12A  | NPW     | SCN1B    | TUB      | MMP14     |          |
| CLDN4    | HSPD1    | NRBP2   | SDK2     | UNC5A    | MMS22L    |          |
| CLU      | IAPP     | NRXN2   | SFTPD    | UNC5B    | MPV17L2   |          |
| COL6A1   | IDNK     | NSG1    | SHISA4   | VAT1L    | MRAS      |          |
| COL9A2   | IDS      | OLFM1   | SHISA6   | VTN      | MRE11     |          |
| CPE      | IGFBP3   | OMA1    | SHROOM2  | VWA5A    | MSANTD2   |          |
| CPLX1    | IGFBP7   | PACRG   | SIGIRR   | WNT4     | NETO2     |          |
| CPLX2    | IGSF21   | PACSIN1 | SIGLEC15 | WSCD2    | NFKBIB    |          |
| CREG2    | IL11RA   | PALM2   | SIL1     | X1.Mar   | NRAS      |          |
| CST3     | IL17RB   | PAX6    | SIX2     | XKR4     | NUS1      |          |
| CTSB     | IL1R1    | PCBP4   | SLC12A8  | ZDHHC22  | ORC6      |          |
| CYBA     | IL20RA   | PCDHA10 | SLC16A12 | ZFYVE28  | PAIP2B    |          |
| DACH2    | IMPDH1   | PCDHB10 | SLC18A2  | ZNF860   | PEX5      |          |
| DCTN1    | INS      | PCDHB13 | SLC22A17 |          |           |          |
| DCX      | INSYN1   | PCDHB14 | SLC25A27 |          |           |          |
| DDC      | IRX3     | PCDHB6  | SLC35D3  |          |           |          |



## Supplemental Figure Legends

### Figure S1. Pseudoislets exhibit re-aggregation of the principal islet cell-types after lentiviral transduction

(A-L) Immunostaining of INS (red) and GCG (white) paired with GFP (green) in human pseudoislets five days after transduction with (A-D) Control, (E-H) *SIX2*<sup>kd</sup> and (I-L) *SIX3*<sup>kd</sup> lentiviruses. (M-X) Immunostaining of INS (white) and STT (red) paired with GFP (green) in human pseudoislets five days after transduction with (M-P) Control, (Q-T) *SIX2*<sup>kd</sup> and (U-X) *SIX3*<sup>kd</sup> lentiviruses. Scale bars, 20  $\mu$ m.

### Figure S2. $\beta$ -cells *SIX2*<sup>kd</sup> RNAseq

(A) *SIX2* mRNA expression in sorted  $\beta$ -cells of control (grey bar) and *SIX2*<sup>kd</sup> (green bar) (n=4 independent donors). (B) Insulin, Glucagon CPA-1 and KRT19 mRNA expression in pre-sorted (black bars), GFP<sup>+</sup> Insulin<sup>+</sup> control (grey bars) and *SIX2*<sup>kd</sup> (green bars) pseudoislet cells, data normalized to human beta actin. (C) Detailed FACS scheme used to sort GFP<sup>+</sup>  $\beta$ -cells of Control and *SIX2*<sup>kd</sup> pseudoislets: single, live, GFP<sup>+</sup> cells were used for intracellular staining with INS and GCG antibodies, and INS<sup>+</sup> cells were used for RNA extraction and RNA-Seq library building: see methods. (D) PCA plot showing variance due to knockdown and donor conditions (n=4 independent donors). (E) Heatmap of the sample-to-sample distances of all RNA-Seq samples used in this experiment. The scale bar indicates the euclidean distance. The data is presented as mean, error bars represent the standard error. Two-tailed t tests were used to generate *P* values. \*\*\* *P*<0.0001

**Figure S3. *SIX2*<sup>kd</sup> in  $\beta$ -cells results in a distinct set of differentially expressed genes compared to SC  $\beta$ -like cells:** (A) *SIX2*<sup>kd</sup> downregulated genes (B) *SIX2*<sup>kd</sup> upregulated genes. For both datasets, DE genes were calculated using DEseq2, *P*<0.05 (see methods).

**Figure S4. *SIX2*-Flag CUT&RUN in adult human islets.** (A) Western blot using anti-Flag antibody on protein lysates from either *SIX2*-Flag or control (Empty construct) human islets. (B) Histogram plotting averaged reads showing enrichment of read densities in the peak centers for the *SIX2*-Flag libraries. (C-E) Tracks showing *SIX2*-Flag genomic regions associated to (D) IAPP, (E) MLXIPL, (F) GREM1. Accessible chromatin regions in human islets are shown by ATAC-seq, H3K27ac and H3K4me3 ChIP-seq tracks of whole human islets. *SIX2* CUT&RUN (*SIX2* C&R) peaks are shown in pink boxes, and regulated genes highlighted in green boxes.

**Figure S5.  $\beta$ -cells *SIX3*<sup>kd</sup> RNAseq:** (A,B) Human pseudoislets five days after transduction with *SIX3*<sup>kd</sup> lentiviruses: (A) bright field; (B) blue light (488 nm), scale bars = 1000  $\mu$ m. (C) Detailed FACS scheme used to sort *SIX3*<sup>kd</sup> GFP<sup>+</sup>  $\beta$ -cells: live, GFP<sup>+</sup>, INS<sup>+</sup> cells were sorted for RNA extraction and RNA-Seq library building. (D) *SIX3* mRNA expression in sorted  $\beta$ -cells of control (grey bar) and *SIX3*<sup>kd</sup> (blue bar) (n=3). (E) Insulin, Glucagon CPA-1 and KRT19 mRNA expression in pre-sorted (black bars), GFP<sup>+</sup> Insulin<sup>+</sup> control (grey bars) and *SIX3*<sup>kd</sup> (blue bars) pseudoislet cells (n=3 independent donors), data normalized to human beta actin. (F) PCA plot showing variance due to knockdown and donor conditions. (n=3). (G) KEGG pathways enriched in genes downregulated in  $\beta$ -cells post-*SIX3*<sup>kd</sup>. The data is presented as mean, error bars represent the standard error. Two-tailed t tests were used to generate *P* values. \*\* *P*<0.05

**Figure S6. SIX2 and SIX3 targets are distinct:** Boxplots displaying normalized TPM counts of (A) selected *SIX2*<sup>kd</sup> targets in the adult  $\beta$ -cell; the expression of which is not affected by *SIX3*<sup>kd</sup>, control (grey bars), *SIX2*<sup>kd</sup> (green bars), *SIX3*<sup>kd</sup> (blue bars). (B) selected *SIX3*<sup>kd</sup> targets in the adult  $\beta$ -cell; the expression of which is not affected by *SIX2*<sup>kd</sup>, control (grey bars), *SIX2*<sup>kd</sup> (green bars), *SIX3*<sup>kd</sup> (blue bars). Box plots show the mean. \*,  $P < 0.05$

**Figure S7. SIX3 overexpression in juvenile  $\beta$ -cells:** (A) Western blot using anti-SIX3 antibody on protein lysates from either non infected control (NIC), infected Control (Ct, Empty construct) or SIX3-Flag overexpressed human islets. (B-C) FACS scheme used to sort Flag+ SIX3-ox juvenile  $\beta$ -cells, using intracellular staining with INS and GCG antibodies and intranuclear staining with Flag antibody, for the Empty Control (Ct) and SIX3-Flag (SIX3-ox) overexpressed human islets. (D) Boxplots displaying normalized TPM counts of *SIX3*, *INS* and selected *SIX3* targets in the adult  $\beta$ -cell; the expression of which is inversely affected by SIX3-ox in juvenile  $\beta$ -cells (n=1), control (black bars), *SIX3*<sup>kd</sup> (blue bars), *SIX3*<sup>ox</sup> (red bars). Box plots show the mean. \*,  $P < 0.05$
